# Supplementary material for: New ternary compounds containing Zn–Cu and Zn–Ag from single molecular source precursors
Source: Royal Society of Chemistry journal article supplement (doi:10.1039/c3ra48025a), 2014-01-01
Supplement: c3ra48025a1.pdf [file c3ra48025a1.pdf]

## Supporting data for manuscript

# New ternary compounds containing Zn-Cu and Zn-Ag from single molecular source precursors

Suryabhan Singh, Jyotsna Chaturvedi and Subrato Bhattacharya\*

Department of Chemistry, Banaras Hindu University, Varanasi-221005, India.

E-Mail: s\_bhatt@bhu.ac.in

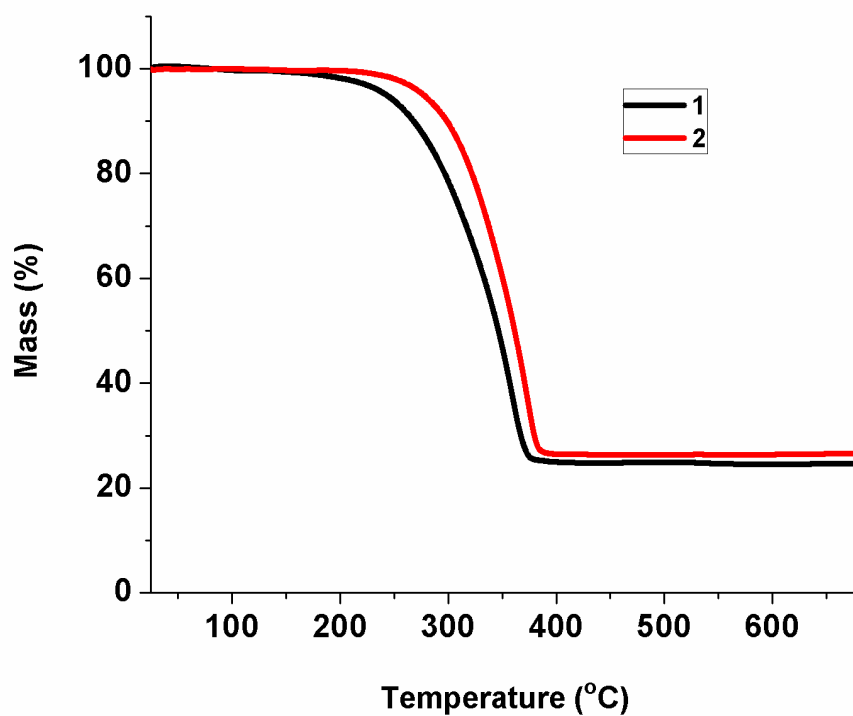

**Fig. S1:** TGA plots of complexes.

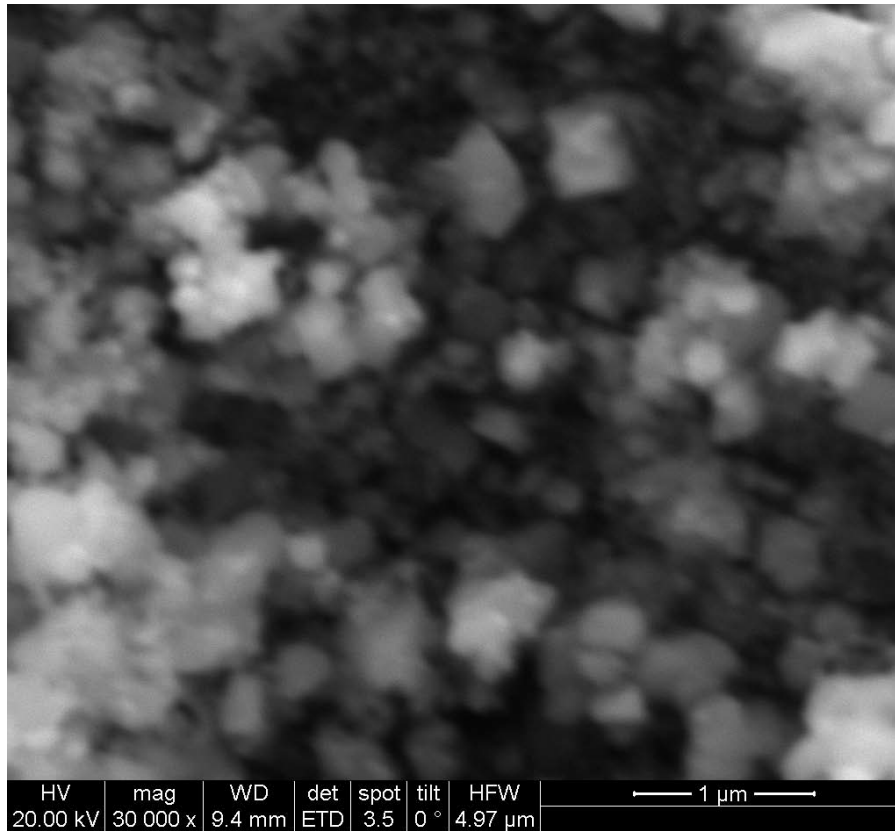

**Fig. S2:** SEM image of ZnS/CuS alloy

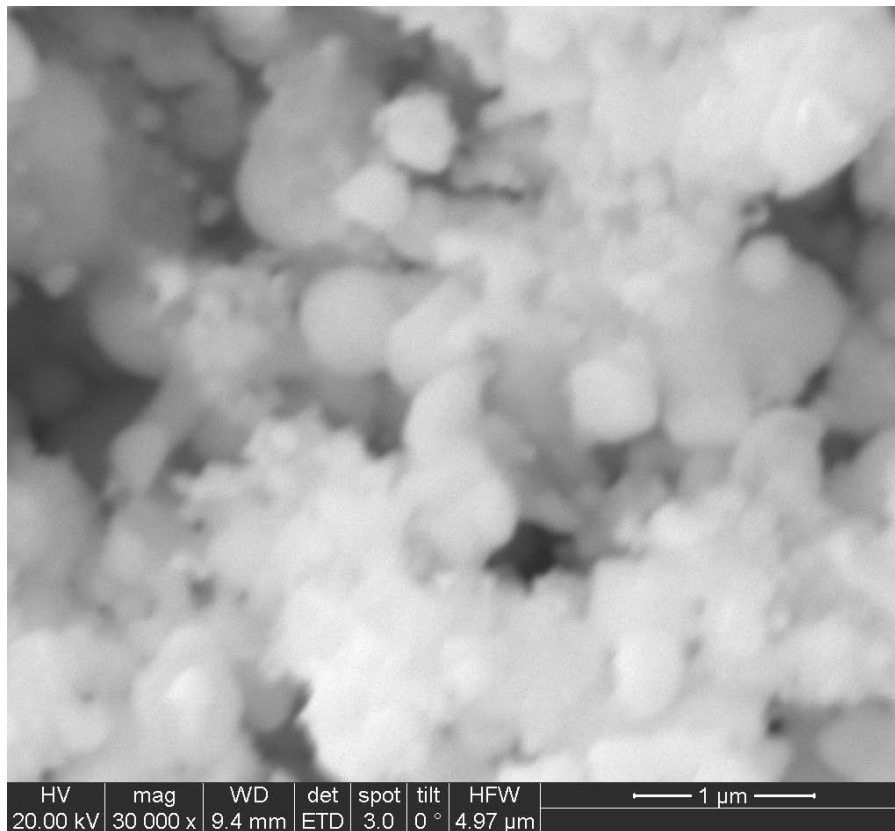

**Fig. S3:** SEM image of ZnSAg<sub>2</sub>S alloy

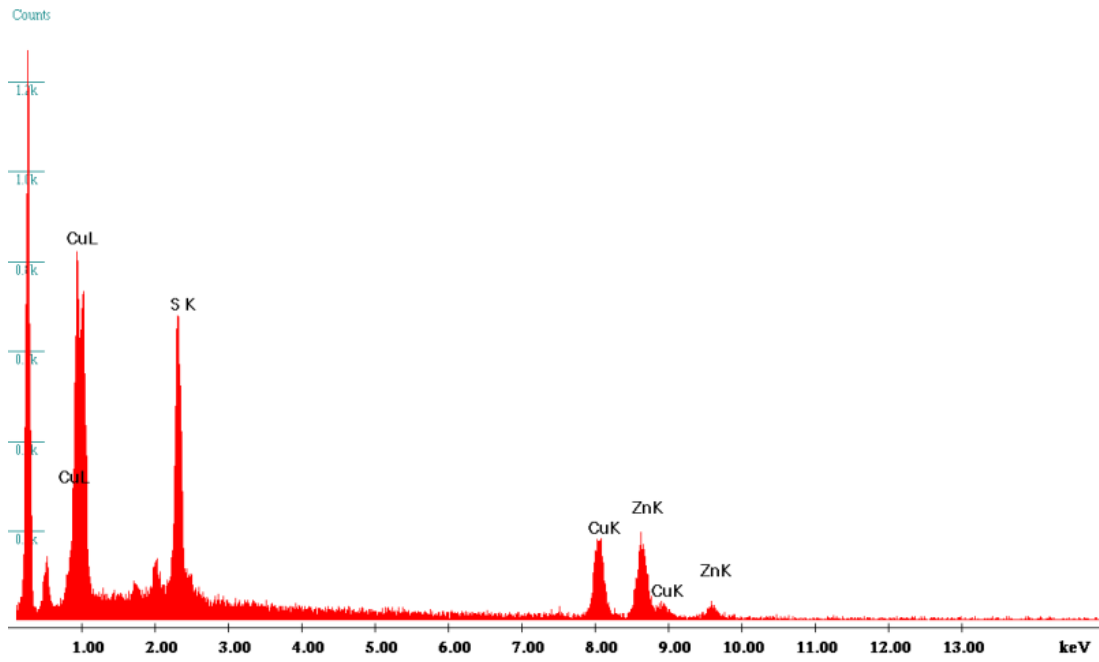

**Fig. S4:** EDS plot of ZnCuS<sub>2</sub>.

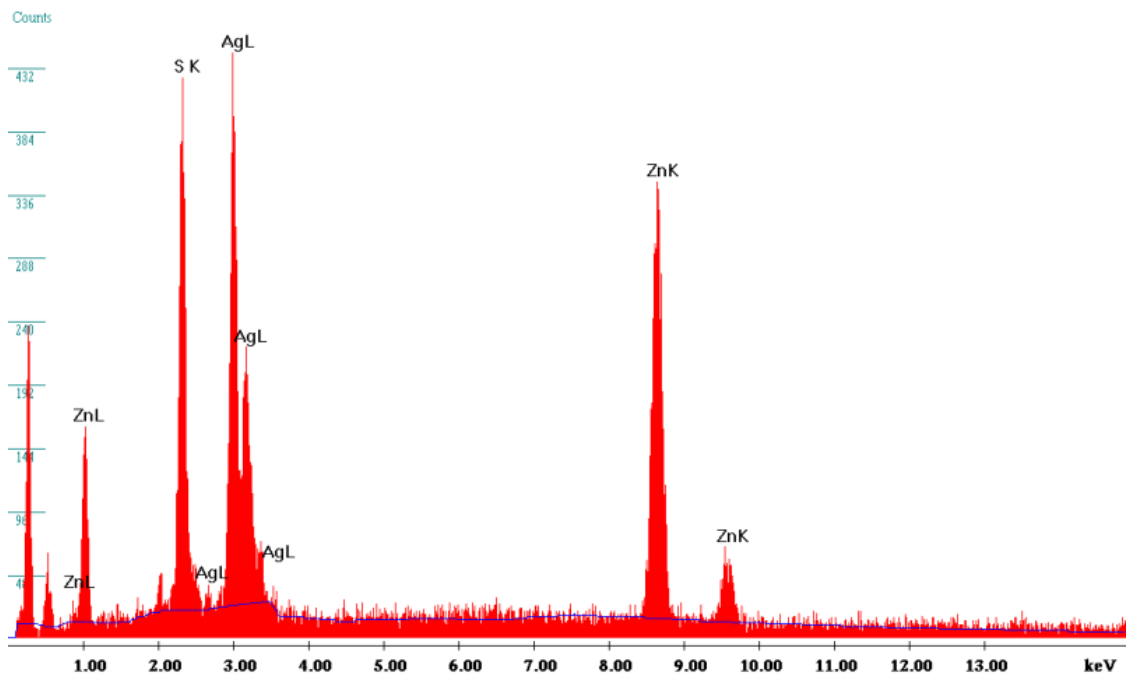

**Fig. S5:** EDS plot of Zn<sub>2</sub>AgS<sub>1.5</sub>.

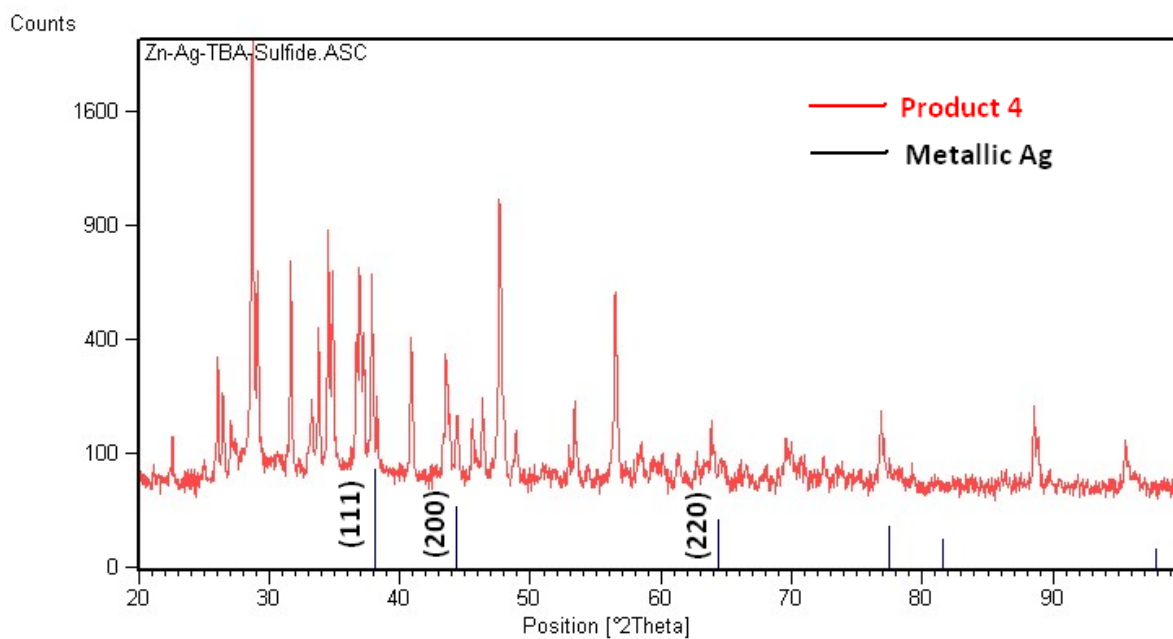

**Fig. S6.** Powder X-rd pattern of 4 showing the presence of metallic silver along with the ZnS/Ag<sub>2</sub>S alloy.

**Table S1**

| <b>Complexes</b> |     | <b>Elements</b> |       |       |       |
|------------------|-----|-----------------|-------|-------|-------|
|                  |     | SK              | ZnK   | CuK   | AgL   |
| <b>3</b>         | Wt% | 35.14           | 33.98 | 30.87 | --    |
|                  | At% | 52.15           | 24.73 | 23.12 | --    |
| <b>4</b>         | Wt% | 14.85           | 47.48 | --    | 37.68 |
|                  | At% | 30.10           | 47.20 | --    | 22.70 |
